# Supplementary material
Source: PubMed Central journal article supplement (PMC2964100)
Supplement: supp_137.21.3707_DEV052001SuppTableS3.pdf [file supp_137.21.3707_DEV052001SuppTableS3.pdf]

**Table S3. Closed versus open neural tube phenotype among embryos from crosses between parents with various combinations of *Fz1*, *Fz2* and *Vangl2* alleles**

|          |                                                                                       | Neural tube |      | Total |
|----------|---------------------------------------------------------------------------------------|-------------|------|-------|
|          |                                                                                       | Closed      | Open |       |
| Parents: | <i>Fz1</i> <sup>-/-</sup> × <i>Vangl2</i> <sup>Lp/+</sup>                             |             |      |       |
| Progeny: | <i>Fz1</i> <sup>+/-</sup>                                                             | 34          | 0    | 34    |
|          | <i>Fz1</i> <sup>+/-</sup> ; <i>Vangl2</i> <sup>Lp/+</sup>                             | 5           | 12   | 17    |
| Parents: | <i>Fz2</i> <sup>+/-</sup> × <i>Vangl2</i> <sup>Lp/+</sup>                             |             |      |       |
| Progeny: | WT                                                                                    | 27          | 0    | 27    |
|          | <i>Fz2</i> <sup>+/-</sup>                                                             | 19          | 0    | 19    |
|          | <i>Vangl2</i> <sup>Lp/+</sup>                                                         | 12          | 0    | 12    |
|          | <i>Fz2</i> <sup>+/-</sup> ; <i>Vangl2</i> <sup>Lp/+</sup>                             | 3           | 6    | 9     |
| Parents: | <i>Fz1</i> <sup>+/-</sup> ; <i>Fz2</i> <sup>+/-</sup> × <i>Vangl2</i> <sup>Lp/+</sup> |             |      |       |
| Progeny: | <i>Vangl2</i> <sup>Lp/+</sup>                                                         | 9           | 0    | 9     |
|          | <i>Fz1</i> <sup>+/-</sup> ; <i>Vangl2</i> <sup>Lp/+</sup>                             | 5           | 3    | 8     |
|          | <i>Fz2</i> <sup>+/-</sup> ; <i>Vangl2</i> <sup>Lp/+</sup>                             | 6           | 4    | 10    |
|          | <i>Fz1</i> <sup>+/-</sup> ; <i>Fz2</i> <sup>+/-</sup> ; <i>Vangl2</i> <sup>Lp/+</sup> | 4           | 2    | 6     |
|          | All <i>Vangl2</i> <sup>+/+</sup> genotypes                                            | 52          | 0    | 52    |
| Parents: | <i>Fz2</i> <sup>+/-</sup> × <i>Fz2</i> <sup>+/-</sup> ; <i>Vangl2</i> <sup>Lp/+</sup> |             |      |       |
| Progeny: | <i>Vangl2</i> <sup>Lp/+</sup>                                                         | 3           | 0    | 3     |
|          | <i>Fz2</i> <sup>+/-</sup> ; <i>Vangl2</i> <sup>Lp/+</sup>                             | 6           | 3    | 9     |
|          | <i>Fz2</i> <sup>-/-</sup> ; <i>Vangl2</i> <sup>Lp/+</sup>                             | 0           | 5    | 5     |
|          | All <i>Vangl2</i> <sup>+/+</sup> genotypes                                            | 56          | 0    | 56    |

Note that the number of embryos recovered with some *Fz1*, *Fz2* and *Vangl2* mutant combinations is reduced relative to control littermates.
