# Supplementary material
Source: PubMed Central journal article supplement (PMC2964100)

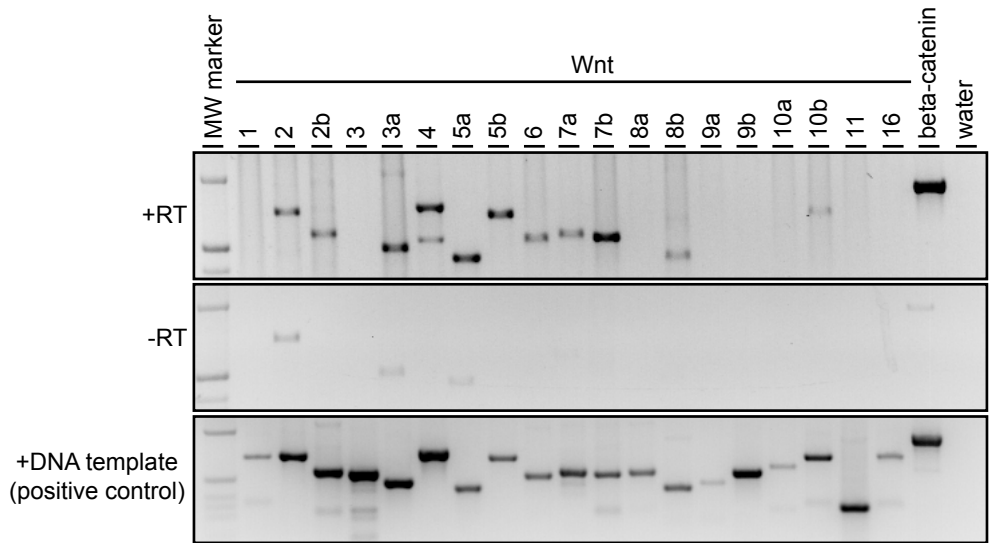

Supplement: supp_137.21.3707_DEV052001FigS4.pdf [file supp_137.21.3707_DEV052001FigS4.pdf]
